# Supplementary material for: Soft Sensor Design via Switching Observers
Source: MDPI journal article supplement (doi:10.3390/s23042114), 2023-02-13
Supplement: s1 [file s1]

Supplementary Material for

# Soft Sensor design via Switching Observers

Fotis N. Koumboulis, Dimitrios G. Fragkoulis, Nikolaos D. Kouvakas and Aikaterini Feidopiasti

**Table S1.** Scenarios of nominal conditions

| Scenario | $U$ [day <sup>-1</sup> ] | $X_1$ [kg/m <sup>3</sup> ] | $X_2$ [kg/m <sup>3</sup> ] |
|----------|--------------------------|----------------------------|----------------------------|
| 1        | 0.1393                   | 0.6502                     | 1.2651                     |
| 2        | 0.2293                   | 1.1696                     | 1.1864                     |
| 3        | 0.3117                   | 1.7370                     | 1.1004                     |
| 4        | 0.3871                   | 2.3571                     | 1.0065                     |
| 5        | 0.4584                   | 3.0598                     | 0.9000                     |
| 6        | 0.5235                   | 3.8299                     | 0.7833                     |
| 7        | 0.5828                   | 4.6741                     | 0.6554                     |
| 8        | 0.6369                   | 5.5995                     | 0.5152                     |
| 9        | 0.6863                   | 6.6139                     | 0.3615                     |
| 10       | 0.7273                   | 7.6154                     | 0.2098                     |

**Table S2.** Optimal observer parameter selection for  $a = 3.16309$

| Scenario | $\rho_{F,1}$ | $\rho_{F,2}$ | $J_{e,A}$ | $\tilde{J}_{e,O}$ |
|----------|--------------|--------------|-----------|-------------------|
| 1        | 3.16309+     | 8.11101      | 0.5       | 2.26608           |
| 2        | 3.16309+     | 5.33798      | 0.5       | 0.54718           |
| 3        | 3.16309+     | 4.77700      | 0.5       | 0.19104           |
| 4        | 3.16309+     | 4.57362      | 0.5       | 0.07841           |
| 5        | 3.16309+     | 4.48782      | 0.5       | 0.03386           |
| 6        | 3.16309+     | 4.45649      | 0.5       | 0.01506           |
| 7        | 3.16309+     | 4.45175      | 0.5       | 0.00660           |
| 8        | 3.16309+     | 4.46083      | 0.5       | 0.00268           |
| 9        | 3.16309+     | 4.47730      | 0.5       | 0.00090           |
| 10       | 3.16309+     | 4.49556      | 0.5       | 0.00022           |

**Table S3.** Optimal observer parameter selection for  $a = 4.74463$

| Scenario | $\rho_{F,1}$ | $\rho_{F,2}$ | $J_{e,A}$ | $\tilde{J}_{e,O}$ |
|----------|--------------|--------------|-----------|-------------------|
| 1        | 4.74463+     | 5.82279      | 0.5       | 2.30452           |
| 2        | 4.74463+     | 5.38508      | 0.5       | 0.57777           |
| 3        | 4.74463+     | 5.23672      | 0.5       | 0.20871           |
| 4        | 4.74463+     | 5.16769      | 0.5       | 0.08826           |
| 5        | 4.74463+     | 5.13005      | 0.5       | 0.03912           |
| 6        | 4.74463+     | 5.10918      | 0.5       | 0.01775           |
| 7        | 4.74463+     | 5.09744      | 0.5       | 0.00788           |
| 8        | 4.74463+     | 5.09103      | 0.5       | 0.00323           |
| 9        | 4.74463+     | 5.08786      | 0.5       | 0.00109           |
| 10       | 4.74463+     | 5.08679      | 0.5       | 0.00027           |

**Table S4.** Minimum and maximum metric values for  $a = 3.16309$ 

| Scenario | Minimum $J_{e,A}$ | Maximum $J_{e,A}$ | Minimum $\tilde{J}_{e,O}$ | Maximum $\tilde{J}_{e,O}$ |
|----------|-------------------|-------------------|---------------------------|---------------------------|
| 1        | 0.4452            | 0.5               | 2.26608                   | 2.2968                    |
| 2        | 0.2899            | 0.5               | 0.54718                   | 0.6001                    |
| 3        | 0.2317            | 0.5               | 0.19104                   | 0.2255                    |
| 4        | 0.2032            | 0.5               | 0.07841                   | 0.0988                    |
| 5        | 0.1870            | 0.5               | 0.03386                   | 0.0453                    |
| 6        | 0.1775            | 0.5               | 0.01506                   | 0.0212                    |
| 7        | 0.1716            | 0.5               | 0.00660                   | 0.0097                    |
| 8        | 0.1680            | 0.5               | 0.00268                   | 0.0041                    |
| 9        | 0.1657            | 0.5               | 0.00090                   | 0.0014                    |
| 10       | 0.1644            | 0.5               | 0.00022                   | 0.00035                   |

**Table S5.** Minimum and maximum metric values for  $a = 4.74463$ 

| Scenario | Minimum $J_{e,A}$ | Maximum $J_{e,A}$ | Minimum $\tilde{J}_{e,O}$ | Maximum $\tilde{J}_{e,O}$ |
|----------|-------------------|-------------------|---------------------------|---------------------------|
| 1        | 0.1747            | 0.5               | 2.30452                   | 2.4033                    |
| 2        | 0.1102            | 0.5               | 0.57777                   | 0.6290                    |
| 3        | 0.0850            | 0.5               | 0.20871                   | 0.2367                    |
| 4        | 0.0721            | 0.5               | 0.08826                   | 0.1041                    |
| 5        | 0.0643            | 0.5               | 0.03912                   | 0.0479                    |
| 6        | 0.0595            | 0.5               | 0.01775                   | 0.0225                    |
| 7        | 0.0563            | 0.5               | 0.00788                   | 0.0103                    |
| 8        | 0.0541            | 0.5               | 0.00323                   | 0.0043                    |
| 9        | 0.0526            | 0.5               | 0.00109                   | 0.0015                    |
| 10       | 0.0516            | 0.5               | 0.00027                   | 0.00037                   |

**Table S6.** Identification process results

| Scenario | $h_D$  | $\hat{h}_D$ | Fluctuation | $h_N$  | $\hat{h}_N$ | Fluctuation |
|----------|--------|-------------|-------------|--------|-------------|-------------|
| 1        | 1.5815 | 1.55785     | 11.23%      | 8.3499 | 8.2062      | 10.61%      |
| 2        | 1.2422 | 1.21168     | 2.66%       | 7.8307 | 7.5833      | 2.74%       |
| 3        | 0.9648 | 0.95675     | 1.94%       | 7.2631 | 7.20247     | 1.86%       |
| 4        | 0.7390 | 0.735441    | 1.57%       | 6.6428 | 6.61295     | 1.46%       |
| 5        | 0.5500 | 0.548011    | 1.30%       | 5.9403 | 5.92086     | 1.42%       |
| 6        | 0.3983 | 0.397059    | 0.99%       | 5.1695 | 5.15708     | 1.22%       |
| 7        | 0.2774 | 0.276654    | 1.00%       | 4.3259 | 4.31716     | 1.03%       |
| 8        | 0.1816 | 1.180927    | 1.31%       | 3.4013 | 3.39306     | 1.01%       |
| 9        | 0.1060 | 0.105466    | 2.04%       | 2.3868 | 2.3823      | 1.34%       |
| 10       | 0.0521 | 0.0516387   | 3.61%       | 1.3839 | 1.37502     | 1.84%       |

**Table S7.** Identification error norms and steady state estimation error

| Scenario | $J_{e,O}^* / u_w^2$ ( $a = 3.16309$ ) | $J_{e,O}^* / u_w^2$ ( $a = 4.74463$ ) |
|----------|---------------------------------------|---------------------------------------|
| 1        | 2.11381                               | 2.14967                               |
| 2        | 0.533495                              | 0.563329                              |
| 3        | 0.187899                              | 0.205286                              |
| 4        | 0.0778057                             | 0.0875864                             |
| 5        | 0.0336782                             | 0.0389032                             |
| 6        | 0.0150149                             | 0.0176936                             |
| 7        | 0.00658277                            | 0.00786332                            |
| 8        | 0.00267343                            | 0.00321651                            |
| 9        | 0.000898796                           | 0.00108247                            |
| 10       | 0.000219048                           | 0.000262766                           |

**Table S8.** Observer parameter and target operating areas

| Scenario | $U_i$  | $\rho_{F,1}$ | $\rho_{F,2}$ | $U_i - u_{i,\max}$ | $U_i + u_{i,\max}$ |
|----------|--------|--------------|--------------|--------------------|--------------------|
| 1        | 0.1393 | 3.5+         | 6.7289       | 0.1183             | 0.1603             |
| 2        | 0.2293 | 3.5+         | 5.1269       | 0.1869             | 0.2718             |
| 3        | 0.3117 | 3.5+         | 4.7294       | 0.2401             | 0.3833             |
| 4        | 0.3871 | 3.5+         | 4.5732       | 0.2757             | 0.4985             |
| 5        | 0.4584 | 3.5+         | 4.5018       | 0.2894             | 0.6274             |
| 6        | 0.5235 | 3.5+         | 4.4716       | 0.2707             | 0.7742             |
| 7        | 0.5828 | 3.5+         | 4.4621       | 0.2013             | 0.7742             |
| 8        | 0.6369 | 3.5+         | 4.4637       | 0.0384             | 0.7742             |
| 9        | 0.6863 | 3.5+         | 4.4716       | 0                  | 0.7742             |
| 10       | 0.7273 | 3.5+         | 4.4817       | 0                  | 0.7742             |

**Table S9.** Observer parameter and target operating areas

| Area | $U_i$ | $h_D$  | $h_N$  | $\hat{h}_D$ | $\hat{h}_N$ | $\rho_{F,1}$ | $\rho_{F,2}$ | $U_i - u_{i,\max}$ | $U_i + u_{i,\max}$ |
|------|-------|--------|--------|-------------|-------------|--------------|--------------|--------------------|--------------------|
| 1    | 0.065 | 1.8904 | 8.7165 | 1.8479      | 8.4729      | 3.5+         | 488.6804     | 0.0566             | 0.0734             |
| 2    | 0.080 | 1.8259 | 8.6464 | 1.7883      | 8.4360      | 3.5+         | 18.4288      | 0.0694             | 0.0906             |
| 3    | 0.105 | 1.7209 | 8.5253 | 1.6952      | 8.3719      | 3.5+         | 9.2990       | 0.09029            | 0.1197             |
| 4    | 0.140 | 1.5788 | 8.3462 | 1.5515      | 8.1911      | 3.5+         | 6.7010       | 0.1189             | 0.1611             |
| 5    | 0.190 | 1.3857 | 8.0688 | 1.3698      | 7.9680      | 3.5+         | 5.5310       | 0.1579             | 0.2221             |
| 6    | 0.280 | 1.0678 | 7.4935 | 1.0614      | 7.4450      | 3.5+         | 4.8404       | 0.2210             | 0.3390             |
| 7    | 0.520 | 0.4059 | 5.2147 | 0.4046      | 55.2005     | 3.5+         | 4.4726       | 0.2728             | 0.7672             |

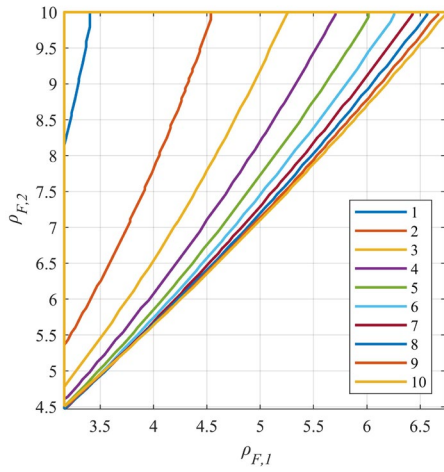

**Figure S1.** Acceptable observer poles' regions for  $a = 3.16309$  and all scenarios of nominal points

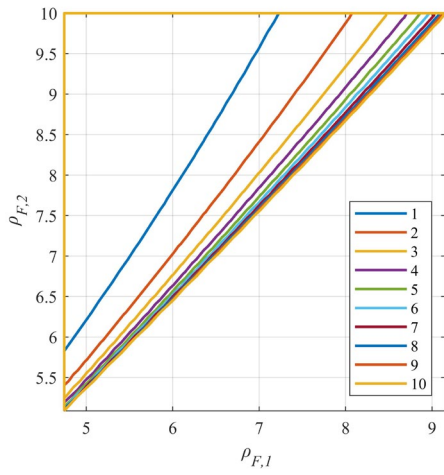

**Figure S2.** Acceptable observer poles' regions for  $a = 4.74463$  and all scenarios of nominal points

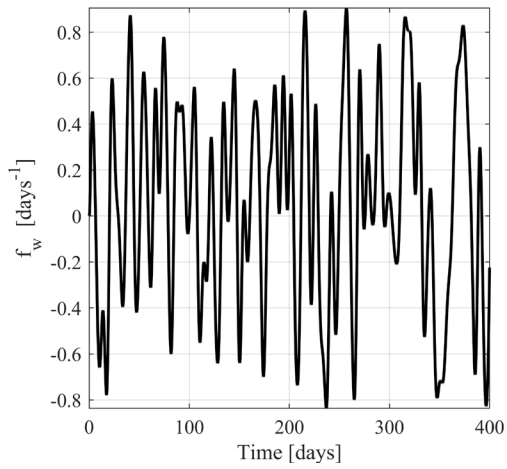

**Figure S3.** Actuation signal  $f_w(t)$

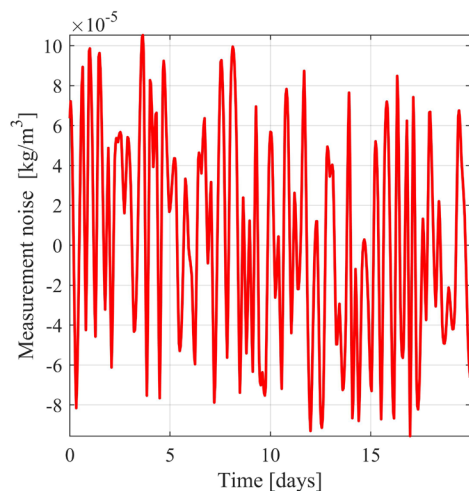

**Figure S4.** Additive measurement noise

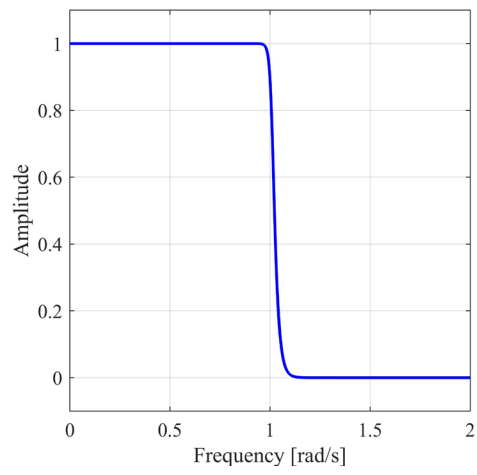

**Figure S5.** Butterworth filter Bode plot

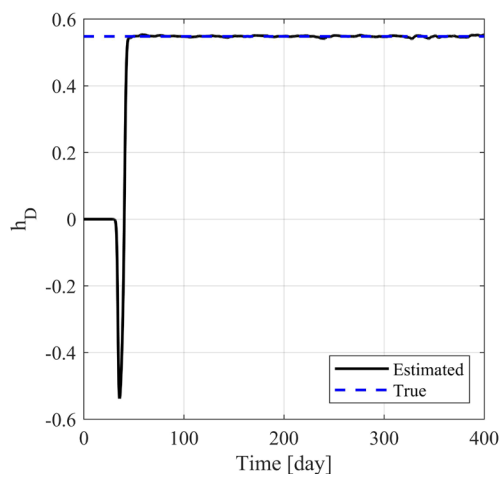

**Figure S6.** Estimation of  $h_D$  for scenario 5.

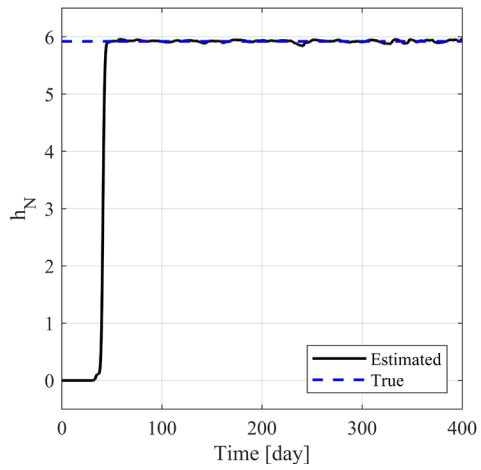

**Figure S7.** Estimation of  $h_N$  for scenario 5.

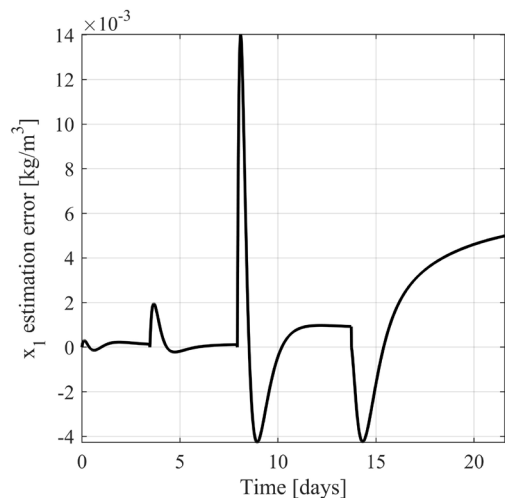

**Figure S8.** Substrate concentration estimation error.

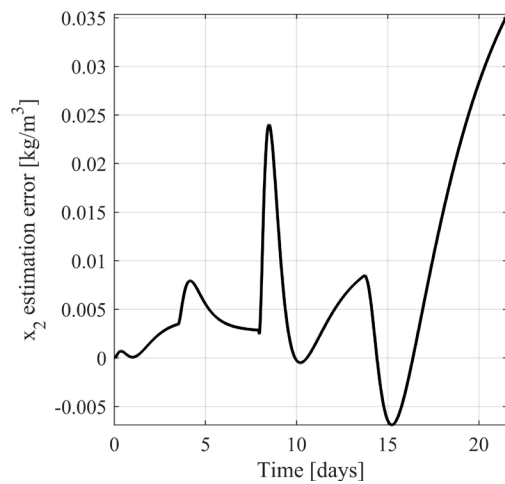

**Figure S9.** Microorganism concentration estimation error.

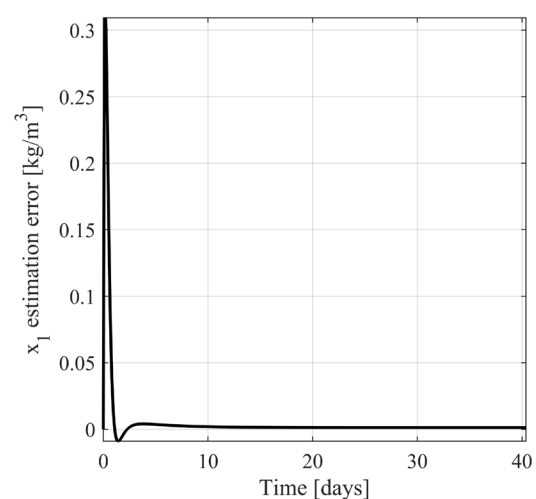

**Figure S10.** Substrate concentration estimation error for single step transition.

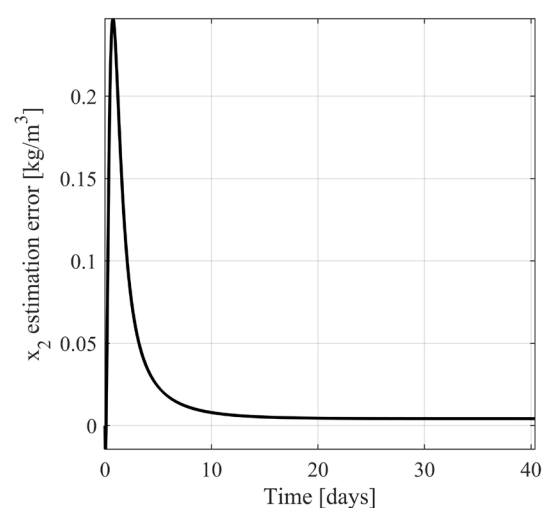

**Figure S11.** Microorganism concentration estimation error for single step transition.

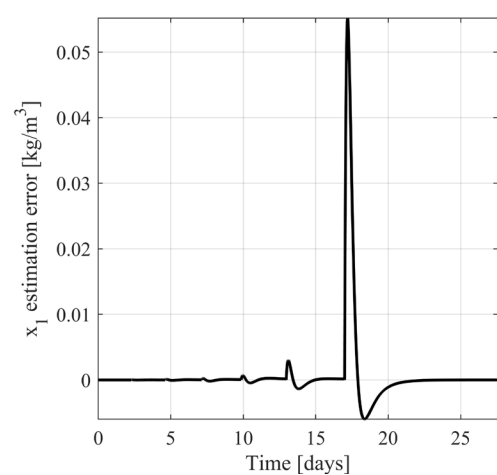

**Figure S12.** Substrate concentration estimation error.

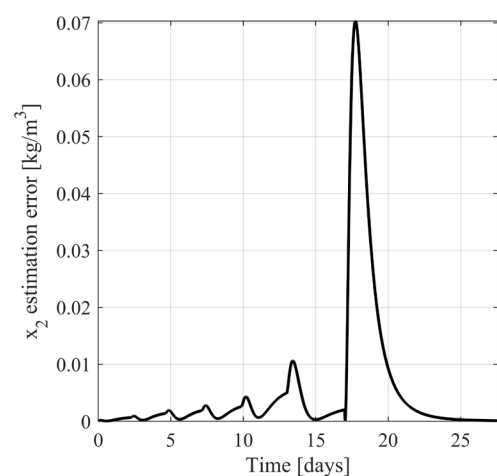

**Figure S13.** Microorganism concentration estimation error.
